# Supplementary material for: Integration of Epidemiological and Genomic Data to Investigate H5N1 HPAI Outbreaks in Northern Italy in 2021-2022
Source: Preprints.org preprint supplement (doi:10.20944/preprints202212.0404.v1), 2022-12-22

Provinces/Countries

- Verona (VR)
- Padova (PD)
- Mantova (MN)
- Cremona (CR)
- Vicenza (VI)
- Rovigo (RO)
- Poland
- Czech Republic

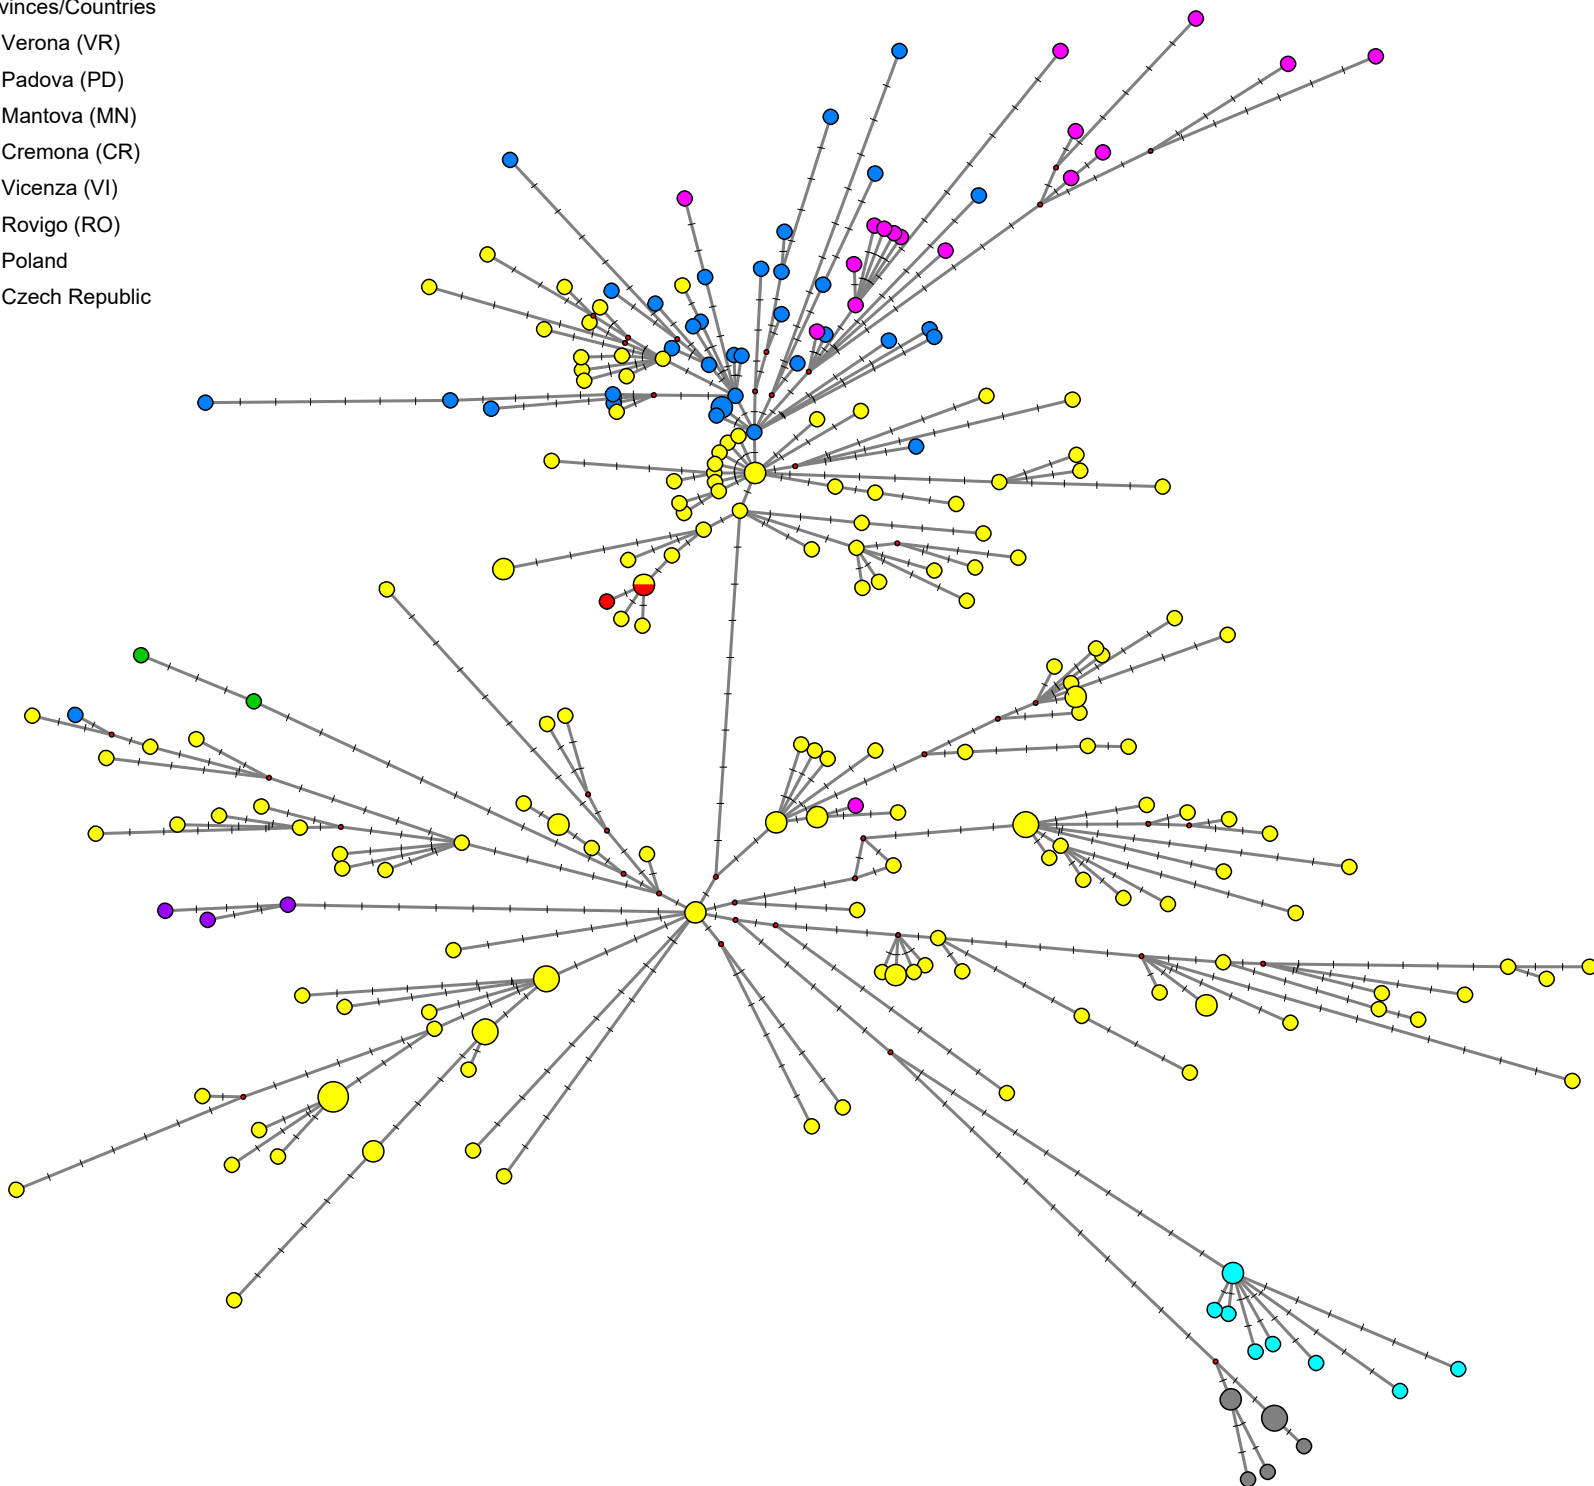

Supplement: Supplementary file 1 [file supplementary]
