# Supplementary material for: Integration of Epidemiological and Genomic Data to Investigate H5N1 HPAI Outbreaks in Northern Italy in 2021-2022
Source: Preprints.org preprint supplement (doi:10.20944/preprints202212.0404.v1), 2022-12-22
Supplement: Supplementary file 2 [file Supplementary Table S2.docx]

**Supplementary Table S2.** Information from the GISAID EpiFlu database on hemagglutinin segments of the European viruses used in this study.

| **Segment ID** | **Country** | **Collection date** | **Isolate-ID** | **Isolate name** | **Originating Lab** | **Submitting Lab** | **Authors** |
| --- | --- | --- | --- | --- | --- | --- | --- |
| EPI2014953 | Poland | 2022-Feb-05 | EPI_ISL_11922811 | A/goose/Poland/H124_22VIR2515-5/2022 | National Veterinary Research Institute | Istituto Zooprofilattico Sperimentale delle Venezie | Swieton, E.; Smietanka, K.; Barbierato, G.; Zecchin, B.; Fusaro, A.; Schivo, A.; Salviato, A.; Palumbo, E.; Giussani, E.; Monne, I.; Terregino, C. |
| EPI1998426 | Spain | 2022-Jan-26 | EPI_ISL_11259319 | A/goose/Spain/294-2_22VIR2142-9/2022 | Laboratorio Central de Veterinaria | Istituto Zooprofilattico Sperimentale delle Venezie | Ruano, M.J.; Rocha, A.; Sanchez, A.; Aguero, M; Barbierato, G.; Zecchin, B.; Fusaro, A.; Schivo, A.; Salviato, A.; Palumbo, E.; Giussani, E.; Monne, I.; Terregino, C. |
| EPI1998418 | Spain | 2022-Jan-22 | EPI_ISL_11259318 | A/goose/Spain/239-1_22VIR2142-8/2022 | Laboratorio Central de Veterinaria | Istituto Zooprofilattico Sperimentale delle Venezie | Ruano, M.J.; Rocha, A.; Sanchez, A.; Aguero, M; Barbierato, G.; Zecchin, B.; Fusaro, A.; Schivo, A.; Salviato, A.; Palumbo, E.; Giussani, E.; Monne, I.; Terregino, C. |
| EPI1998402 | Spain | 2022-Jan-14 | EPI_ISL_11259316 | A/goose/Spain/141-9_22VIR2142-6/2022 | Laboratorio Central de Veterinaria | Istituto Zooprofilattico Sperimentale delle Venezie | Ruano, M.J.; Rocha, A.; Sanchez, A.; Aguero, M; Barbierato, G.; Zecchin, B.; Fusaro, A.; Schivo, A.; Salviato, A.; Palumbo, E.; Giussani, E.; Monne, I.; Terregino, C. |
| EPI1998394 | Spain | 2022-Jan-10 | EPI_ISL_11259315 | A/goose/Spain/88-3_22VIR2142-4/2022 | Laboratorio Central de Veterinaria | Istituto Zooprofilattico Sperimentale delle Venezie | Ruano, M.J.; Rocha, A.; Sanchez, A.; Aguero, M; Barbierato, G.; Zecchin, B.; Fusaro, A.; Schivo, A.; Salviato, A.; Palumbo, E.; Giussani, E.; Monne, I.; Terregino, C. |
| EPI1998298 | Spain | 2022-Jan-07 | EPI_ISL_11259303 | A/goose/Spain/65-3_22VIR2142-2/2022 | Laboratorio Central de Veterinaria | Istituto Zooprofilattico Sperimentale delle Venezie | Ruano, M.J.; Rocha, A.; Sanchez, A.; Aguero, M; Barbierato, G.; Zecchin, B.; Fusaro, A.; Schivo, A.; Salviato, A.; Palumbo, E.; Giussani, E.; Monne, I.; Terregino, C. |
| EPI1998162 | Spain | 2022-Feb-04 | EPI_ISL_11259286 | A/goose/Spain/512-2_22VIR2142-13/2022 | Laboratorio Central de Veterinaria | Istituto Zooprofilattico Sperimentale delle Venezie | Ruano, M.J.; Rocha, A.; Sanchez, A.; Aguero, M; Barbierato, G.; Zecchin, B.; Fusaro, A.; Schivo, A.; Salviato, A.; Palumbo, E.; Giussani, E.; Monne, I.; Terregino, C. |
| EPI1998146 | Ireland | 2022-Feb-14 | EPI_ISL_11259284 | A/goose/Ireland/3869_22VIR2064-2/2022 | Central Veterinary Research Laboratory | Istituto Zooprofilattico Sperimentale delle Venezie | Byrne, C.; Garcia, K.; Cuartero, L.G.; Barbierato, G.; Zecchin, B.; Fusaro, A.; Schivo, A.; Salviato, A.; Palumbo, E.; Giussani, E.; Monne, I.; Terregino, C. |
| EPI1968921 | France | 2021-Dec-23 | EPI_ISL_9377021 | A/goose/France/21P014207/2021 | Anses (Ploufragan-Plouzané) | ANSES Agence Nationale De Securite Sanitaire De L’alimentation | NA |
| EPI1949898 | France | 2021-Nov-25 | EPI_ISL_8377418 | A/goose/France/21P013228/2021 | Anses (Ploufragan-Plouzané) | ANSES Agence Nationale De Securite Sanitaire De L’alimentation | NA |
| EPI1848934 | United Kingdom | 2021-Feb-10 | EPI_ISL_1123361 | A/pheasant/Scotland/000348/2021 | Animal and Plant Health Agency (APHA) | Animal and Plant Health Agency (APHA) | NA |
| EPI1966009 | Belgium | 2022-Jan-04 | EPI_ISL_9162331 | A/Phasianus_colchicus/Belgium/294/2022 | Sciensano - Animal Infectious Diseases | Sciensano, Department of Animal Infectious Diseases | Van Borm, Steven; Roupie, Virginie; Lambrecht, Benedicte; Mathijs, Elisabeth; Steensels, Mieke |
| EPI2014977 | Poland | 2022-Feb-17 | EPI_ISL_11922814 | A/swan/Poland/MB083_22VIR2515-8/2022 | National Veterinary Research Institute | Istituto Zooprofilattico Sperimentale delle Venezie | Swieton, E.; Smietanka, K.; Barbierato, G.; Zecchin, B.; Fusaro, A.; Schivo, A.; Salviato, A.; Palumbo, E.; Giussani, E.; Monne, I.; Terregino, C. |
| EPI2014969 | Poland | 2022-Feb-10 | EPI_ISL_11922813 | A/swan/Poland/MB078_22VIR2515-7/2022 | National Veterinary Research Institute | Istituto Zooprofilattico Sperimentale delle Venezie | Swieton, E.; Smietanka, K.; Barbierato, G.; Zecchin, B.; Fusaro, A.; Schivo, A.; Salviato, A.; Palumbo, E.; Giussani, E.; Monne, I.; Terregino, C. |
| EPI1998210 | Spain | 2021-Dec-22 | EPI_ISL_11259292 | A/swan/Spain/4087-1_22VIR2142-1/2021 | Laboratorio Central de Veterinaria | Istituto Zooprofilattico Sperimentale delle Venezie | Ruano, M.J.; Rocha, A.; Sanchez, A.; Aguero, M; Barbierato, G.; Zecchin, B.; Fusaro, A.; Schivo, A.; Salviato, A.; Palumbo, E.; Giussani, E.; Monne, I.; Terregino, C. |
| EPI1995124 | Slovenia | 2022-Jan-03 | EPI_ISL_11007535 | A/swan/Slovenia/13_22VIR777-8/2022 | University of Ljubljana | Istituto Zooprofilattico Sperimentale delle Venezie | Slavec, B.; Ra?nik, J.; Krape?, U.; ?labravec, Z.; A?ko, J.; Cociancich, V.; Paller, T.; Vidrih, ?.; Rojs, O.Z.; Arseniev, S.; Groza, O.; Barbierato, G.; Zecchin, B.; Fusaro, A.; Schivo, A.; Salviato, A.; Palumbo, E.; Giussani, E.; Monne, I.; Terregino, C. |
| EPI1995108 | Slovenia | 2021-Dec-30 | EPI_ISL_11007533 | A/swan/Slovenia/2073_22VIR777-6/2021 | University of Ljubljana | Istituto Zooprofilattico Sperimentale delle Venezie | Slavec, B.; Ra?nik, J.; Krape?, U.; ?labravec, Z.; A?ko, J.; Cociancich, V.; Paller, T.; Vidrih, ?.; Rojs, O.Z.; Arseniev, S.; Groza, O.; Barbierato, G.; Zecchin, B.; Fusaro, A.; Schivo, A.; Salviato, A.; Palumbo, E.; Giussani, E.; Monne, I.; Terregino, C. |
| EPI1995100 | Slovenia | 2021-Dec-30 | EPI_ISL_11007532 | A/swan/Slovenia/2072_22VIR777-5/2021 | University of Ljubljana | Istituto Zooprofilattico Sperimentale delle Venezie | Slavec, B.; Ra?nik, J.; Krape?, U.; ?labravec, Z.; A?ko, J.; Cociancich, V.; Paller, T.; Vidrih, ?.; Rojs, O.Z.; Arseniev, S.; Groza, O.; Barbierato, G.; Zecchin, B.; Fusaro, A.; Schivo, A.; Salviato, A.; Palumbo, E.; Giussani, E.; Monne, I.; Terregino, C. |
| EPI1995092 | Slovenia | 2021-Dec-29 | EPI_ISL_11007531 | A/swan/Slovenia/2060_22VIR777-4/2021 | University of Ljubljana | Istituto Zooprofilattico Sperimentale delle Venezie | Slavec, B.; Ra?nik, J.; Krape?, U.; ?labravec, Z.; A?ko, J.; Cociancich, V.; Paller, T.; Vidrih, ?.; Rojs, O.Z.; Arseniev, S.; Groza, O.; Barbierato, G.; Zecchin, B.; Fusaro, A.; Schivo, A.; Salviato, A.; Palumbo, E.; Giussani, E.; Monne, I.; Terregino, C. |
| EPI1995084 | Slovenia | 2021-Dec-27 | EPI_ISL_11007530 | A/swan/Slovenia/2049_22VIR777-3/2021 | University of Ljubljana | Istituto Zooprofilattico Sperimentale delle Venezie | Slavec, B.; Ra?nik, J.; Krape?, U.; ?labravec, Z.; A?ko, J.; Cociancich, V.; Paller, T.; Vidrih, ?.; Rojs, O.Z.; Arseniev, S.; Groza, O.; Barbierato, G.; Zecchin, B.; Fusaro, A.; Schivo, A.; Salviato, A.; Palumbo, E.; Giussani, E.; Monne, I.; Terregino, C. |
| EPI1995076 | Slovenia | 2021-Dec-26 | EPI_ISL_11007529 | A/swan/Slovenia/2041_22VIR777-2/2021 | University of Ljubljana | Istituto Zooprofilattico Sperimentale delle Venezie | Slavec, B.; Ra?nik, J.; Krape?, U.; ?labravec, Z.; A?ko, J.; Cociancich, V.; Paller, T.; Vidrih, ?.; Rojs, O.Z.; Arseniev, S.; Groza, O.; Barbierato, G.; Zecchin, B.; Fusaro, A.; Schivo, A.; Salviato, A.; Palumbo, E.; Giussani, E.; Monne, I.; Terregino, C. |
| EPI1840056 | United Kingdom | 2020-Dec-03 | EPI_ISL_766876 | A/mute_swan/England/234255/2020 | Animal and Plant Health Agency (APHA) | Animal and Plant Health Agency (APHA) | NA |
| EPI1963897 | United Kingdom | 2021-Nov-09 | EPI_ISL_9029962 | A/Whooper_swan/Scotland/056219/2021 | Animal and Plant Health Agency (APHA) | Animal and Plant Health Agency (APHA) | NA |
| EPI1963881 | United Kingdom | 2021-Nov-11 | EPI_ISL_9029960 | A/mute_swan/England/385466/2021 | Animal and Plant Health Agency (APHA) | Animal and Plant Health Agency (APHA) | NA |
| EPI1950887 | Romania | 2021-Nov-26 | EPI_ISL_8440976 | A/mute_swan/Romania/16790_21VIR11355/2021 | Institute for Diagnosis & Animal Health (IDAH) | Istituto Zooprofilattico Sperimentale Delle Venezie | Burlacu, R.; Neicut, A.; Onita, I.; Motiu, R.; Zecchin, B.; Fusaro, A.; Schivo, A.; Salviato, A.; Palumbo, E.; Milani, A.; Giussani, E.; Pastori, A.; Monne, I.; Terregino, C. |
| EPI1950879 | Romania | 2021-Nov-11 | EPI_ISL_8440175 | A/Cygnus_olor/Romania/16381_21VIR10306/2021 | Institute for Diagnosis & Animal Health (IDAH) | Istituto Zooprofilattico Sperimentale Delle Venezie | Burlacu, R.; Neicut, A.; Onita, I.; Motiu, R.; Zecchin, B.; Fusaro, A.; Schivo, A.; Salviato, A.; Palumbo, E.; Milani, A.; Giussani, E.; Pastori, A.; Monne, I.; Terregino, C. |
| EPI1937671 | Poland | 2021-Nov-08 | EPI_ISL_6937114 | A/mute_swan/Poland/MB490-L1/2021 | National Veterinary Research Institut Poland, PIWet-PIB | National Veterinary Research Institut Poland, PIWet-PIB | E. Swieton, K. Smietanka |
| EPI1928148 | France | 2021-Nov-08 | EPI_ISL_6590766 | A/swan/France/21P012384/2021 | Anses (Ploufragan-Plouzané) | ANSES Agence Nationale De Securite Sanitaire De L’alimentation | NA |
| EPI1924123 | United Kingdom | 2021-Oct-24 | EPI_ISL_5804708 | A/mute_swan/England/053054/2021 | Animal and Plant Health Agency (APHA) | Animal and Plant Health Agency (APHA) | NA |
| EPI1998362 | Spain | 2022-Feb-15 | EPI_ISL_11259311 | A/turkey/Spain/646-7_22VIR2142-37/2022 | Laboratorio Central de Veterinaria | Istituto Zooprofilattico Sperimentale delle Venezie | Ruano, M.J.; Rocha, A.; Sanchez, A.; Aguero, M; Barbierato, G.; Zecchin, B.; Fusaro, A.; Schivo, A.; Salviato, A.; Palumbo, E.; Giussani, E.; Monne, I.; Terregino, C. |
| EPI1998354 | Spain | 2022-Feb-15 | EPI_ISL_11259310 | A/turkey/Spain/645-1_22VIR2142-36/2022 | Laboratorio Central de Veterinaria | Istituto Zooprofilattico Sperimentale delle Venezie | Ruano, M.J.; Rocha, A.; Sanchez, A.; Aguero, M; Barbierato, G.; Zecchin, B.; Fusaro, A.; Schivo, A.; Salviato, A.; Palumbo, E.; Giussani, E.; Monne, I.; Terregino, C. |
| EPI1998322 | Spain | 2022-Feb-14 | EPI_ISL_11259306 | A/turkey/Spain/586-4_22VIR2142-32/2022 | Laboratorio Central de Veterinaria | Istituto Zooprofilattico Sperimentale delle Venezie | Ruano, M.J.; Rocha, A.; Sanchez, A.; Aguero, M; Barbierato, G.; Zecchin, B.; Fusaro, A.; Schivo, A.; Salviato, A.; Palumbo, E.; Giussani, E.; Monne, I.; Terregino, C. |
| EPI1998282 | Spain | 2022-Feb-09 | EPI_ISL_11259301 | A/turkey/Spain/540-26_22VIR2142-28/2022 | Laboratorio Central de Veterinaria | Istituto Zooprofilattico Sperimentale delle Venezie | Ruano, M.J.; Rocha, A.; Sanchez, A.; Aguero, M; Barbierato, G.; Zecchin, B.; Fusaro, A.; Schivo, A.; Salviato, A.; Palumbo, E.; Giussani, E.; Monne, I.; Terregino, C. |
| EPI1998274 | Spain | 2022-Feb-08 | EPI_ISL_11259300 | A/turkey/Spain/490-24_22VIR2142-27/2022 | Laboratorio Central de Veterinaria | Istituto Zooprofilattico Sperimentale delle Venezie | Ruano, M.J.; Rocha, A.; Sanchez, A.; Aguero, M; Barbierato, G.; Zecchin, B.; Fusaro, A.; Schivo, A.; Salviato, A.; Palumbo, E.; Giussani, E.; Monne, I.; Terregino, C. |
| EPI1998266 | Spain | 2022-Feb-08 | EPI_ISL_11259299 | A/turkey/Spain/490-22_22VIR2142-26/2022 | Laboratorio Central de Veterinaria | Istituto Zooprofilattico Sperimentale delle Venezie | Ruano, M.J.; Rocha, A.; Sanchez, A.; Aguero, M; Barbierato, G.; Zecchin, B.; Fusaro, A.; Schivo, A.; Salviato, A.; Palumbo, E.; Giussani, E.; Monne, I.; Terregino, C. |
| EPI1998258 | Spain | 2022-Feb-08 | EPI_ISL_11259298 | A/turkey/Spain/489-21_22VIR2142-25/2022 | Laboratorio Central de Veterinaria | Istituto Zooprofilattico Sperimentale delle Venezie | Ruano, M.J.; Rocha, A.; Sanchez, A.; Aguero, M; Barbierato, G.; Zecchin, B.; Fusaro, A.; Schivo, A.; Salviato, A.; Palumbo, E.; Giussani, E.; Monne, I.; Terregino, C. |
| EPI1998250 | Spain | 2022-Feb-06 | EPI_ISL_11259297 | A/turkey/Spain/455-96_22VIR2142-24/2022 | Laboratorio Central de Veterinaria | Istituto Zooprofilattico Sperimentale delle Venezie | Ruano, M.J.; Rocha, A.; Sanchez, A.; Aguero, M; Barbierato, G.; Zecchin, B.; Fusaro, A.; Schivo, A.; Salviato, A.; Palumbo, E.; Giussani, E.; Monne, I.; Terregino, C. |
| EPI1998242 | Spain | 2022-Feb-06 | EPI_ISL_11259296 | A/turkey/Spain/455-83_22VIR2142-23/2022 | Laboratorio Central de Veterinaria | Istituto Zooprofilattico Sperimentale delle Venezie | Ruano, M.J.; Rocha, A.; Sanchez, A.; Aguero, M; Barbierato, G.; Zecchin, B.; Fusaro, A.; Schivo, A.; Salviato, A.; Palumbo, E.; Giussani, E.; Monne, I.; Terregino, C. |
| EPI1998202 | Spain | 2022-Jan-15 | EPI_ISL_11259291 | A/turkey/Spain/140-38_22VIR2142-19/2022 | Laboratorio Central de Veterinaria | Istituto Zooprofilattico Sperimentale delle Venezie | Ruano, M.J.; Rocha, A.; Sanchez, A.; Aguero, M; Barbierato, G.; Zecchin, B.; Fusaro, A.; Schivo, A.; Salviato, A.; Palumbo, E.; Giussani, E.; Monne, I.; Terregino, C. |
| EPI1998025 | Ireland | 2021-Nov-19 | EPI_ISL_11259269 | A/turkey/Ireland/033674_22VIR1325-19/2021 | Central Veterinary Research Laboratory | Istituto Zooprofilattico Sperimentale delle Venezie | Byrne, C.; Garcia, K.; Cuartero, L.G.; Barbierato, G.; Zecchin, B.; Fusaro, A.; Schivo, A.; Salviato, A.; Palumbo, E.; Giussani, E.; Monne, I.; Terregino, C. |
| EPI1998009 | Ireland | 2021-Dec-06 | EPI_ISL_11259267 | A/turkey/Ireland/035425_22VIR1325-17/2021 | Central Veterinary Research Laboratory | Istituto Zooprofilattico Sperimentale delle Venezie | Byrne, C.; Garcia, K.; Cuartero, L.G.; Barbierato, G.; Zecchin, B.; Fusaro, A.; Schivo, A.; Salviato, A.; Palumbo, E.; Giussani, E.; Monne, I.; Terregino, C. |
| EPI1995156 | Bulgaria | 2021-Nov-30 | EPI_ISL_11007539 | A/turkey/Bulgaria/755-1_22VIR778-4/2021 | NDRVMI (National Diagnostic and Research Veterinary Medical Institute) | Istituto Zooprofilattico Sperimentale delle Venezie | Goujgoulova, G.; Slavcheva, I.; Oreshkova, L.; Barbierato, G.; Zecchin, B.; Fusaro, A.; Schivo, A.; Salviato, A.; Palumbo, E.; Giussani, E.; Monne, I.; Terregino, C. |
| EPI1945187 | Germany | 2021-Oct-20 | EPI_ISL_7753290 | A/turkey/Germany-MV/AI06035/2021 | Landesamt für Landwirtschaft, Lebensmittelsicherheit und Fischerei (LALLF) | Friedrich-Loeffler-Institut | NA |
| EPI1943844 | Germany | 2021-May-03 | EPI_ISL_5146481 | A/turkey/Germany-NI/AI04425/2021 | Lebensmittel- und Veterinärinstitut Oldenburg - Standort Veterinärinstitut | Friedrich-Loeffler-Institut | NA |
| EPI1943845 | Germany | 2021-Apr-27 | EPI_ISL_5146292 | A/turkey/Germany-NI/AI04373/2021 | Lebensmittel- und Veterinärinstitut Oldenburg - Standort Veterinärinstitut | Friedrich-Loeffler-Institut | NA |
| EPI1943857 | Germany | 2021-May-05 | EPI_ISL_5145223 | A/turkey/Germany-NI/AI04455/2021 | Lebensmittel- und Veterinärinstitut Oldenburg - Standort Veterinärinstitut | Friedrich-Loeffler-Institut | NA |
| EPI1998430 | Ireland | 2021-Dec-22 | EPI_ISL_11260218 | A/mute_swan/Ireland/037311_22VIR1325-13/2021 | Central Veterinary Research Laboratory | Istituto Zooprofilattico Sperimentale delle Venezie | Byrne, C.; Garcia, K.; Cuartero, L.G.; Barbierato, G.; Zecchin, B.; Fusaro, A.; Schivo, A.; Salviato, A.; Palumbo, E.; Giussani, E.; Monne, I.; Terregino, C. |
| EPI1998410 | Spain | 2022-Jan-17 | EPI_ISL_11259317 | A/stork/Spain/234-2_22VIR2142-7/2022 | Laboratorio Central de Veterinaria | Istituto Zooprofilattico Sperimentale delle Venezie | Ruano, M.J.; Rocha, A.; Sanchez, A.; Aguero, M; Barbierato, G.; Zecchin, B.; Fusaro, A.; Schivo, A.; Salviato, A.; Palumbo, E.; Giussani, E.; Monne, I.; Terregino, C. |
| EPI1998378 | Spain | 2022-Jan-11 | EPI_ISL_11259313 | A/gray_heron/Spain/88-2_22VIR2142-3/2022 | Laboratorio Central de Veterinaria | Istituto Zooprofilattico Sperimentale delle Venezie | Ruano, M.J.; Rocha, A.; Sanchez, A.; Aguero, M; Barbierato, G.; Zecchin, B.; Fusaro, A.; Schivo, A.; Salviato, A.; Palumbo, E.; Giussani, E.; Monne, I.; Terregino, C. |
| EPI1998194 | Spain | 2022-Feb-22 | EPI_ISL_11259290 | A/stork/Spain/729-1_22VIR2142-18/2022 | Laboratorio Central de Veterinaria | Istituto Zooprofilattico Sperimentale delle Venezie | Ruano, M.J.; Rocha, A.; Sanchez, A.; Aguero, M; Barbierato, G.; Zecchin, B.; Fusaro, A.; Schivo, A.; Salviato, A.; Palumbo, E.; Giussani, E.; Monne, I.; Terregino, C. |
| EPI1998186 | Spain | 2022-Feb-10 | EPI_ISL_11259289 | A/gray_heron/Spain/602-1_22VIR2142-17/2022 | Laboratorio Central de Veterinaria | Istituto Zooprofilattico Sperimentale delle Venezie | Ruano, M.J.; Rocha, A.; Sanchez, A.; Aguero, M; Barbierato, G.; Zecchin, B.; Fusaro, A.; Schivo, A.; Salviato, A.; Palumbo, E.; Giussani, E.; Monne, I.; Terregino, C. |
| EPI1998178 | Spain | 2022-Feb-14 | EPI_ISL_11259288 | A/common_crane/Spain/597-2_22VIR2142-15/2022 | Laboratorio Central de Veterinaria | Istituto Zooprofilattico Sperimentale delle Venezie | Ruano, M.J.; Rocha, A.; Sanchez, A.; Aguero, M; Barbierato, G.; Zecchin, B.; Fusaro, A.; Schivo, A.; Salviato, A.; Palumbo, E.; Giussani, E.; Monne, I.; Terregino, C. |
| EPI1998170 | Spain | 2022-Feb-03 | EPI_ISL_11259287 | A/stork/Spain/538-2_22VIR2142-14/2022 | Laboratorio Central de Veterinaria | Istituto Zooprofilattico Sperimentale delle Venezie | Ruano, M.J.; Rocha, A.; Sanchez, A.; Aguero, M; Barbierato, G.; Zecchin, B.; Fusaro, A.; Schivo, A.; Salviato, A.; Palumbo, E.; Giussani, E.; Monne, I.; Terregino, C. |
| EPI1998154 | Spain | 2022-Feb-03 | EPI_ISL_11259285 | A/stork/Spain/442-8_22VIR2142-12/2022 | Laboratorio Central de Veterinaria | Istituto Zooprofilattico Sperimentale delle Venezie | Ruano, M.J.; Rocha, A.; Sanchez, A.; Aguero, M; Barbierato, G.; Zecchin, B.; Fusaro, A.; Schivo, A.; Salviato, A.; Palumbo, E.; Giussani, E.; Monne, I.; Terregino, C. |
| EPI1998130 | Ireland | 2021-Nov-16 | EPI_ISL_11259282 | A/brent_goose/Ireland/033257_22VIR1325-9/2021 | Central Veterinary Research Laboratory | Istituto Zooprofilattico Sperimentale delle Venezie | Byrne, C.; Garcia, K.; Cuartero, L.G.; Barbierato, G.; Zecchin, B.; Fusaro, A.; Schivo, A.; Salviato, A.; Palumbo, E.; Giussani, E.; Monne, I.; Terregino, C. |
| EPI1998122 | Ireland | 2021-Nov-15 | EPI_ISL_11259281 | A/white-fronted_goose/Ireland/033181_22VIR1325-8/2021 | Central Veterinary Research Laboratory | Istituto Zooprofilattico Sperimentale delle Venezie | Byrne, C.; Garcia, K.; Cuartero, L.G.; Barbierato, G.; Zecchin, B.; Fusaro, A.; Schivo, A.; Salviato, A.; Palumbo, E.; Giussani, E.; Monne, I.; Terregino, C. |
| EPI1998114 | Ireland | 2021-Nov-15 | EPI_ISL_11259280 | A/greylag_goose/Ireland/033062_22VIR1325-7/2021 | Central Veterinary Research Laboratory | Istituto Zooprofilattico Sperimentale delle Venezie | Byrne, C.; Garcia, K.; Cuartero, L.G.; Barbierato, G.; Zecchin, B.; Fusaro, A.; Schivo, A.; Salviato, A.; Palumbo, E.; Giussani, E.; Monne, I.; Terregino, C. |
| EPI1998106 | Ireland | 2021-Nov-15 | EPI_ISL_11259279 | A/greylag_goose/Ireland/032969_22VIR1325-6/2021 | Central Veterinary Research Laboratory | Istituto Zooprofilattico Sperimentale delle Venezie | Byrne, C.; Garcia, K.; Cuartero, L.G.; Barbierato, G.; Zecchin, B.; Fusaro, A.; Schivo, A.; Salviato, A.; Palumbo, E.; Giussani, E.; Monne, I.; Terregino, C. |
| EPI1998098 | Ireland | 2021-Nov-12 | EPI_ISL_11259278 | A/magpie/Ireland/032958_22VIR1325-5/2021 | Central Veterinary Research Laboratory | Istituto Zooprofilattico Sperimentale delle Venezie | Byrne, C.; Garcia, K.; Cuartero, L.G.; Barbierato, G.; Zecchin, B.; Fusaro, A.; Schivo, A.; Salviato, A.; Palumbo, E.; Giussani, E.; Monne, I.; Terregino, C. |
| EPI1998090 | Ireland | 2021-Nov-12 | EPI_ISL_11259277 | A/whooper_swan/Ireland/032960_22VIR1325-4/2021 | Central Veterinary Research Laboratory | Istituto Zooprofilattico Sperimentale delle Venezie | Byrne, C.; Garcia, K.; Cuartero, L.G.; Barbierato, G.; Zecchin, B.; Fusaro, A.; Schivo, A.; Salviato, A.; Palumbo, E.; Giussani, E.; Monne, I.; Terregino, C. |
| EPI1998082 | Ireland | 2021-Nov-10 | EPI_ISL_11259276 | A/peregrine_falcon/Ireland/032476_22VIR1325-3/2021 | Central Veterinary Research Laboratory | Istituto Zooprofilattico Sperimentale delle Venezie | Byrne, C.; Garcia, K.; Cuartero, L.G.; Barbierato, G.; Zecchin, B.; Fusaro, A.; Schivo, A.; Salviato, A.; Palumbo, E.; Giussani, E.; Monne, I.; Terregino, C. |
| EPI1998074 | Ireland | 2021-Nov-09 | EPI_ISL_11259275 | A/whooper_swan/Ireland/032444_22VIR1325-2/2021 | Central Veterinary Research Laboratory | Istituto Zooprofilattico Sperimentale delle Venezie | Byrne, C.; Garcia, K.; Cuartero, L.G.; Barbierato, G.; Zecchin, B.; Fusaro, A.; Schivo, A.; Salviato, A.; Palumbo, E.; Giussani, E.; Monne, I.; Terregino, C. |
| EPI1998066 | Ireland | 2021-Nov-03 | EPI_ISL_11259274 | A/white-tailed_eagle/Ireland/032034_22VIR1325-23/2021 | Central Veterinary Research Laboratory | Istituto Zooprofilattico Sperimentale delle Venezie | Byrne, C.; Garcia, K.; Cuartero, L.G.; Barbierato, G.; Zecchin, B.; Fusaro, A.; Schivo, A.; Salviato, A.; Palumbo, E.; Giussani, E.; Monne, I.; Terregino, C. |
| EPI1998050 | Ireland | 2021-Nov-29 | EPI_ISL_11259272 | A/layer/Ireland/034424_22VIR1325-21/2021 | Central Veterinary Research Laboratory | Istituto Zooprofilattico Sperimentale delle Venezie | Byrne, C.; Garcia, K.; Cuartero, L.G.; Barbierato, G.; Zecchin, B.; Fusaro, A.; Schivo, A.; Salviato, A.; Palumbo, E.; Giussani, E.; Monne, I.; Terregino, C. |
| EPI1998033 | Ireland | 2021-Nov-08 | EPI_ISL_11259270 | A/mute_swan/Ireland/032363_22VIR1325-1/2021 | Central Veterinary Research Laboratory | Istituto Zooprofilattico Sperimentale delle Venezie | Byrne, C.; Garcia, K.; Cuartero, L.G.; Barbierato, G.; Zecchin, B.; Fusaro, A.; Schivo, A.; Salviato, A.; Palumbo, E.; Giussani, E.; Monne, I.; Terregino, C. |
| EPI1998001 | Ireland | 2021-Nov-19 | EPI_ISL_11259266 | A/mute_swan/Ireland/033945_22VIR1325-16/2021 | Central Veterinary Research Laboratory | Istituto Zooprofilattico Sperimentale delle Venezie | Byrne, C.; Garcia, K.; Cuartero, L.G.; Barbierato, G.; Zecchin, B.; Fusaro, A.; Schivo, A.; Salviato, A.; Palumbo, E.; Giussani, E.; Monne, I.; Terregino, C. |
| EPI1997993 | Ireland | 2022-Jan-05 | EPI_ISL_11259265 | A/peregrine_falcon/Ireland/000191_22VIR1325-15/2022 | Central Veterinary Research Laboratory | Istituto Zooprofilattico Sperimentale delle Venezie | Byrne, C.; Garcia, K.; Cuartero, L.G.; Barbierato, G.; Zecchin, B.; Fusaro, A.; Schivo, A.; Salviato, A.; Palumbo, E.; Giussani, E.; Monne, I.; Terregino, C. |
| EPI1997985 | Ireland | 2021-Nov-15 | EPI_ISL_11259264 | A/mute_swan/Ireland/033169_22VIR1325-14/2021 | Central Veterinary Research Laboratory | Istituto Zooprofilattico Sperimentale delle Venezie | Byrne, C.; Garcia, K.; Cuartero, L.G.; Barbierato, G.; Zecchin, B.; Fusaro, A.; Schivo, A.; Salviato, A.; Palumbo, E.; Giussani, E.; Monne, I.; Terregino, C. |
| EPI1997977 | Ireland | 2022-Jan-07 | EPI_ISL_11259263 | A/buzzard/Ireland/000656_22VIR1325-12/2022 | Central Veterinary Research Laboratory | Istituto Zooprofilattico Sperimentale delle Venezie | Byrne, C.; Garcia, K.; Cuartero, L.G.; Barbierato, G.; Zecchin, B.; Fusaro, A.; Schivo, A.; Salviato, A.; Palumbo, E.; Giussani, E.; Monne, I.; Terregino, C. |
| EPI1997969 | Ireland | 2021-Dec-08 | EPI_ISL_11259262 | A/crow/Ireland/035624_22VIR1325-11/2021 | Central Veterinary Research Laboratory | Istituto Zooprofilattico Sperimentale delle Venezie | Byrne, C.; Garcia, K.; Cuartero, L.G.; Barbierato, G.; Zecchin, B.; Fusaro, A.; Schivo, A.; Salviato, A.; Palumbo, E.; Giussani, E.; Monne, I.; Terregino, C. |
| EPI1997961 | Ireland | 2021-Nov-17 | EPI_ISL_11259261 | A/herring_gull/Ireland/033533_22VIR1325-10/2021 | Central Veterinary Research Laboratory | Istituto Zooprofilattico Sperimentale delle Venezie | Byrne, C.; Garcia, K.; Cuartero, L.G.; Barbierato, G.; Zecchin, B.; Fusaro, A.; Schivo, A.; Salviato, A.; Palumbo, E.; Giussani, E.; Monne, I.; Terregino, C. |
| EPI1995236 | Moldova, Republic of | 2022-Jan-03 | EPI_ISL_11007721 | A/laying_hen/Moldova/68-2_22VIR638-2/2022 | Republican Center of Veterinary Diagnostics | Istituto Zooprofilattico Sperimentale delle Venezie | Arseniev, S.; Groza, O.; Barbierato, G.; Zecchin, B.; Fusaro, A.; Schivo, A.; Salviato, A.; Palumbo, E.; Giussani, E.; Monne, I.; Terregino, C. |
| EPI1995172 | Bulgaria | 2021-Dec-02 | EPI_ISL_11007541 | A/hen/Bulgaria/757-6_22VIR778-7/2021 | NDRVMI (National Diagnostic and Research Veterinary Medical Institute) | Istituto Zooprofilattico Sperimentale delle Venezie | Goujgoulova, G.; Slavcheva, I.; Oreshkova, L.; Barbierato, G.; Zecchin, B.; Fusaro, A.; Schivo, A.; Salviato, A.; Palumbo, E.; Giussani, E.; Monne, I.; Terregino, C. |
| EPI1995148 | Bulgaria | 2021-Nov-15 | EPI_ISL_11007538 | A/hen/Bulgaria/722-1_22VIR778-1/2021 | NDRVMI (National Diagnostic and Research Veterinary Medical Institute) | Istituto Zooprofilattico Sperimentale delle Venezie | Goujgoulova, G.; Slavcheva, I.; Oreshkova, L.; Barbierato, G.; Zecchin, B.; Fusaro, A.; Schivo, A.; Salviato, A.; Palumbo, E.; Giussani, E.; Monne, I.; Terregino, C. |
| EPI1995140 | Bulgaria | 2021-Dec-29 | EPI_ISL_11007537 | A/hen/Bulgaria/854-1_22VIR778-10/2021 | NDRVMI (National Diagnostic and Research Veterinary Medical Institute) | Istituto Zooprofilattico Sperimentale delle Venezie | Goujgoulova, G.; Slavcheva, I.; Oreshkova, L.; Barbierato, G.; Zecchin, B.; Fusaro, A.; Schivo, A.; Salviato, A.; Palumbo, E.; Giussani, E.; Monne, I.; Terregino, C. |
| EPI1995116 | Slovenia | 2021-Dec-30 | EPI_ISL_11007534 | A/seagull/Slovenia/2075_22VIR777-7/2021 | University of Ljubljana | Istituto Zooprofilattico Sperimentale delle Venezie | Slavec, B.; Ra?nik, J.; Krape?, U.; ?labravec, Z.; A?ko, J.; Cociancich, V.; Paller, T.; Vidrih, ?.; Rojs, O.Z.; Arseniev, S.; Groza, O.; Barbierato, G.; Zecchin, B.; Fusaro, A.; Schivo, A.; Salviato, A.; Palumbo, E.; Giussani, E.; Monne, I.; Terregino, C. |
| EPI1995068 | Slovenia | 2021-Dec-26 | EPI_ISL_11007528 | A/rooster/Slovenia/2039_22VIR777-1/2021 | University of Ljubljana | Istituto Zooprofilattico Sperimentale delle Venezie | Slavec, B.; Ra?nik, J.; Krape?, U.; ?labravec, Z.; A?ko, J.; Cociancich, V.; Paller, T.; Vidrih, ?.; Rojs, O.Z.; Arseniev, S.; Groza, O.; Barbierato, G.; Zecchin, B.; Fusaro, A.; Schivo, A.; Salviato, A.; Palumbo, E.; Giussani, E.; Monne, I.; Terregino, C. |
| EPI1995060 | Moldova, Republic of | 2022-Jan-03 | EPI_ISL_11007527 | A/laying_hen/Moldova/68-1_22VIR638-1/2022 | Republican Center of Veterinary Diagnostics | Istituto Zooprofilattico Sperimentale delle Venezie | Arseniev, S.; Groza, O.; Barbierato, G.; Zecchin, B.; Fusaro, A.; Schivo, A.; Salviato, A.; Palumbo, E.; Giussani, E.; Monne, I.; Terregino, C. |
| EPI1949882 | France | 2021-Dec-03 | EPI_ISL_8377254 | A/egret/France/21P013418/2021 | Anses (Ploufragan-Plouzané) | ANSES Agence Nationale De Securite Sanitaire De L’alimentation | NA |
| EPI1943854 | Germany | 2021-Jul-17 | EPI_ISL_5145744 | A/oystercatcher/Germany-NI/AI05047/2021 | Lebensmittel- und Veterinärinstitut Oldenburg - Standort Veterinärinstitut | Friedrich-Loeffler-Institut | NA |
| EPI1998138 | Ireland | 2022-Feb-14 | EPI_ISL_11259283 | A/fox/Ireland/3866_22VIR2064-1/2022 | Central Veterinary Research Laboratory | Istituto Zooprofilattico Sperimentale delle Venezie | Byrne, C.; Garcia, K.; Cuartero, L.G.; Barbierato, G.; Zecchin, B.; Fusaro, A.; Schivo, A.; Salviato, A.; Palumbo, E.; Giussani, E.; Monne, I.; Terregino, C. |
| EPI1945585 | Estonia | 2021-Nov-08 | EPI_ISL_7778880 | A/Red_fox/Estonia/TA2126820_21VIR10433-13/2021 | Estonian Veterinary and Food Laboratory | Istituto Zooprofilattico Sperimentale Delle Venezie | Nurmoja, I.; Vilem, A.; Juurik, T.; Zecchin, B.; Fusaro, A.; Schivo, A.; Salviato, A.; Palumbo, E.; Milani, A.; Giussani, E.; Pastori, A.; Monne, I.; Terregino, C. |
| EPI1958565 | United Kingdom | 2021-Dec-26 | EPI_ISL_8799552 | A/England/215201407/2021 | UK Health Security Agency - Colindale | UK Health Security Agency (UKHSA) | UKHSA, Respiratory Virus Unit |
| EPI1995045 | Netherlands | 2022-Jan-29 | EPI_ISL_10993196 | A/Sanderling/Netherlands/1/2022 | Erasmus Medical Center | Erasmus Medical Center | NA |
| EPI1995037 | Netherlands | 2021-Nov-29 | EPI_ISL_10993166 | A/Mallard/Netherlands/8/2021 | Erasmus Medical Center | Erasmus Medical Center | NA |
| EPI1995029 | Netherlands | 2021-Nov-29 | EPI_ISL_10993134 | A/Mallard/Netherlands/7/2021 | Erasmus Medical Center | Erasmus Medical Center | NA |
| EPI1995021 | Netherlands | 2021-Nov-29 | EPI_ISL_10993105 | A/Mallard/Netherlands/6/2021 | Erasmus Medical Center | Erasmus Medical Center | NA |
| EPI1995013 | Netherlands | 2021-Nov-29 | EPI_ISL_10993076 | A/Mallard/Netherlands/5/2021 | Erasmus Medical Center | Erasmus Medical Center | NA |
| EPI1995005 | Netherlands | 2021-Nov-29 | EPI_ISL_10993075 | A/Mallard/Netherlands/4/2021 | Erasmus Medical Center | Erasmus Medical Center | NA |
| EPI1994997 | Netherlands | 2022-Feb-14 | EPI_ISL_10993074 | A/Mallard/Netherlands/2/2022 | Erasmus Medical Center | Erasmus Medical Center | NA |
| EPI1994989 | Netherlands | 2022-Feb-12 | EPI_ISL_10992813 | A/Mallard/Netherlands/1/2022 | Erasmus Medical Center | Erasmus Medical Center | NA |
| EPI1966970 | Netherlands | 2022-Jan-11 | EPI_ISL_9261743 | A/Oystercatcher/Netherlands/1/2022 | Erasmus Medical Center | Erasmus Medical Center | NA |
| EPI1963368 | Netherlands | 2021-Dec-27 | EPI_ISL_9012580 | A/Mallard/Netherlands/15/2021 | Erasmus Medical Center | Erasmus Medical Center | NA |
| EPI1963360 | Netherlands | 2021-Dec-27 | EPI_ISL_9012578 | A/Mallard/Netherlands/14/2021 | Erasmus Medical Center | Erasmus Medical Center | NA |
| EPI1963352 | Netherlands | 2021-Dec-27 | EPI_ISL_9012577 | A/Mallard/Netherlands/13/2021 | Erasmus Medical Center | Erasmus Medical Center | NA |
| EPI1945291 | Germany | 2021-Oct-26 | EPI_ISL_7753443 | A/buzzard/Germany-SH/AI06210/2021 | Landeslabor Schleswig-Holstein | Friedrich-Loeffler-Institut | NA |
| EPI1877873 | Poland | 2021-Apr-20 | EPI_ISL_2681045 | A/white_stork/Poland/MB391/2021 | National Veterinary Research Institut Poland, PIWet-PIB | National Veterinary Research Institut Poland, PIWet-PIB | Edyta, Swieton; Kamila, Dziadek; Krzysztof, Smietanka |
| EPI2014961 | Poland | 2022-Jan-23 | EPI_ISL_11922812 | A/chicken/Poland/H071_22VIR2515-6/2022 | National Veterinary Research Institute | Istituto Zooprofilattico Sperimentale delle Venezie | Swieton, E.; Smietanka, K.; Barbierato, G.; Zecchin, B.; Fusaro, A.; Schivo, A.; Salviato, A.; Palumbo, E.; Giussani, E.; Monne, I.; Terregino, C. |
| EPI2014937 | Poland | 2022-Feb-18 | EPI_ISL_11922809 | A/chicken/Poland/H157_22VIR2515-3/2022 | National Veterinary Research Institute | Istituto Zooprofilattico Sperimentale delle Venezie | Swieton, E.; Smietanka, K.; Barbierato, G.; Zecchin, B.; Fusaro, A.; Schivo, A.; Salviato, A.; Palumbo, E.; Giussani, E.; Monne, I.; Terregino, C. |
| EPI2009951 | Germany | 2021-Nov-02 | EPI_ISL_11725988 | A/chicken/Germany-BB/AI06242/2021 | Landeslabor Berlin-Brandenburg | Friedrich-Loeffler-Institut | NA |
| EPI2009943 | Germany | 2021-Oct-29 | EPI_ISL_11725962 | A/chicken/Germany-BB/AI06219/2021 | Landeslabor Berlin-Brandenburg | Friedrich-Loeffler-Institut | NA |
| EPI1998370 | Spain | 2022-Feb-16 | EPI_ISL_11259312 | A/chicken/Spain/649-6_22VIR2142-38/2022 | Laboratorio Central de Veterinaria | Istituto Zooprofilattico Sperimentale delle Venezie | Ruano, M.J.; Rocha, A.; Sanchez, A.; Aguero, M; Barbierato, G.; Zecchin, B.; Fusaro, A.; Schivo, A.; Salviato, A.; Palumbo, E.; Giussani, E.; Monne, I.; Terregino, C. |
| EPI1998346 | Spain | 2022-Feb-16 | EPI_ISL_11259309 | A/chicken/Spain/644-8_22VIR2142-35/2022 | Laboratorio Central de Veterinaria | Istituto Zooprofilattico Sperimentale delle Venezie | Ruano, M.J.; Rocha, A.; Sanchez, A.; Aguero, M; Barbierato, G.; Zecchin, B.; Fusaro, A.; Schivo, A.; Salviato, A.; Palumbo, E.; Giussani, E.; Monne, I.; Terregino, C. |
| EPI1998338 | Spain | 2022-Feb-14 | EPI_ISL_11259308 | A/chicken/Spain/622-8_22VIR2142-34/2022 | Laboratorio Central de Veterinaria | Istituto Zooprofilattico Sperimentale delle Venezie | Ruano, M.J.; Rocha, A.; Sanchez, A.; Aguero, M; Barbierato, G.; Zecchin, B.; Fusaro, A.; Schivo, A.; Salviato, A.; Palumbo, E.; Giussani, E.; Monne, I.; Terregino, C. |
| EPI1998330 | Spain | 2022-Feb-14 | EPI_ISL_11259307 | A/chicken/Spain/587-1_22VIR2142-33/2022 | Laboratorio Central de Veterinaria | Istituto Zooprofilattico Sperimentale delle Venezie | Ruano, M.J.; Rocha, A.; Sanchez, A.; Aguero, M; Barbierato, G.; Zecchin, B.; Fusaro, A.; Schivo, A.; Salviato, A.; Palumbo, E.; Giussani, E.; Monne, I.; Terregino, C. |
| EPI1998314 | Spain | 2022-Feb-11 | EPI_ISL_11259305 | A/chicken/Spain/564-11_22VIR2142-31/2022 | Laboratorio Central de Veterinaria | Istituto Zooprofilattico Sperimentale delle Venezie | Ruano, M.J.; Rocha, A.; Sanchez, A.; Aguero, M; Barbierato, G.; Zecchin, B.; Fusaro, A.; Schivo, A.; Salviato, A.; Palumbo, E.; Giussani, E.; Monne, I.; Terregino, C. |
| EPI1998306 | Spain | 2022-Feb-11 | EPI_ISL_11259304 | A/chicken/Spain/564-4_22VIR2142-30/2022 | Laboratorio Central de Veterinaria | Istituto Zooprofilattico Sperimentale delle Venezie | Ruano, M.J.; Rocha, A.; Sanchez, A.; Aguero, M; Barbierato, G.; Zecchin, B.; Fusaro, A.; Schivo, A.; Salviato, A.; Palumbo, E.; Giussani, E.; Monne, I.; Terregino, C. |
| EPI1998290 | Spain | 2022-Feb-11 | EPI_ISL_11259302 | A/chicken/Spain/562-1_22VIR2142-29/2022 | Laboratorio Central de Veterinaria | Istituto Zooprofilattico Sperimentale delle Venezie | Ruano, M.J.; Rocha, A.; Sanchez, A.; Aguero, M; Barbierato, G.; Zecchin, B.; Fusaro, A.; Schivo, A.; Salviato, A.; Palumbo, E.; Giussani, E.; Monne, I.; Terregino, C. |
| EPI1998234 | Spain | 2022-Feb-07 | EPI_ISL_11259295 | A/chicken/Spain/452-17_22VIR2142-22/2022 | Laboratorio Central de Veterinaria | Istituto Zooprofilattico Sperimentale delle Venezie | Ruano, M.J.; Rocha, A.; Sanchez, A.; Aguero, M; Barbierato, G.; Zecchin, B.; Fusaro, A.; Schivo, A.; Salviato, A.; Palumbo, E.; Giussani, E.; Monne, I.; Terregino, C. |
| EPI1998226 | Spain | 2022-Feb-07 | EPI_ISL_11259294 | A/chicken/Spain/452-1_22VIR2142-21/2022 | Laboratorio Central de Veterinaria | Istituto Zooprofilattico Sperimentale delle Venezie | Ruano, M.J.; Rocha, A.; Sanchez, A.; Aguero, M; Barbierato, G.; Zecchin, B.; Fusaro, A.; Schivo, A.; Salviato, A.; Palumbo, E.; Giussani, E.; Monne, I.; Terregino, C. |
| EPI1998218 | Spain | 2022-Jan-31 | EPI_ISL_11259293 | A/chicken/Spain/340-37_22VIR2142-20/2022 | Laboratorio Central de Veterinaria | Istituto Zooprofilattico Sperimentale delle Venezie | Ruano, M.J.; Rocha, A.; Sanchez, A.; Aguero, M; Barbierato, G.; Zecchin, B.; Fusaro, A.; Schivo, A.; Salviato, A.; Palumbo, E.; Giussani, E.; Monne, I.; Terregino, C. |
| EPI1998042 | Ireland | 2021-Nov-22 | EPI_ISL_11259271 | A/broiler/Ireland/033734_22VIR1325-20/2021 | Central Veterinary Research Laboratory | Istituto Zooprofilattico Sperimentale delle Venezie | Byrne, C.; Garcia, K.; Cuartero, L.G.; Barbierato, G.; Zecchin, B.; Fusaro, A.; Schivo, A.; Salviato, A.; Palumbo, E.; Giussani, E.; Monne, I.; Terregino, C. |
| EPI1949890 | France | 2021-Nov-25 | EPI_ISL_8377417 | A/chicken/France/21P013076/2021 | Anses (Ploufragan-Plouzané) | ANSES Agence Nationale De Securite Sanitaire De L’alimentation | NA |
| EPI1944199 | Germany | 2021-Feb-23 | EPI_ISL_5099451 | A/chicken/Germany-NI/AI01599/2021 | Lebensmittel- und Veterinärinstitut Oldenburg - Standort Veterinärinstitut | Friedrich-Loeffler-Institut | NA |
| EPI1985904 | Netherlands | 2021-Oct-25 | EPI_ISL_9856775 | A/chicken/Netherlands/21037287-006010/2021 | Wageningen Bioveterinary Research | Wageningen Bioveterinary Research | Beerens, Nancy; Harders, Frank; Pritz-Verschuren, Sylvia; Roose, Marit; Venema, Sandra; Germeraad, Evelien; Engelsma, Marc; Heutink, Rene; Luca, Bordes |
| EPI1965237 | Netherlands | 2022-Jan-22 | EPI_ISL_9111105 | A/chicken/Netherlands/22001401-001005/2022 | Wageningen Bioveterinary Research | Wageningen Bioveterinary Research | Beerens, Nancy; Harders, Frank; Pritz-Verschuren, Sylvia; Roose, Marit; Venema, Sandra; Germeraad, Evelien; Engelsma, Marc; Heutink, Rene |
| EPI1923252 | Netherlands | 2021-Oct-22 | EPI_ISL_5588106 | A/chicken/Netherlands/21037233-001/2021 | Wageningen Bioveterinary Research | Wageningen Bioveterinary Research | Beerens, Nancy; Harders, Frank; Pritz-Verschuren, Sylvia; Roose, Marit; Germeraad, Evelien; Engelsma, Marc; Heutink, Rene |
| EPI1923244 | Netherlands | 2021-Oct-25 | EPI_ISL_5588100 | A/chicken/Netherlands/21037287-006010/2021 | Wageningen Bioveterinary Research | Wageningen Bioveterinary Research | Beerens, Nancy; Harders, Frank; Pritz-Verschuren, Sylvia; Roose, Marit; Germeraad, Evelien; Engelsma, Marc; Heutink, Rene |
| EPI1838673 | Netherlands | 2020-Dec-14 | EPI_ISL_711055 | A/chicken/Netherlands/20019879-001005/2020 | Wageningen Bioveterinary Research | Wageningen Bioveterinary Research | Beerens, Nancy; Harders, Frank; Pritz-Verschuren, Sylvia; Roose, Marit; Germeraad, Evelien; Engelsma, Marc; Bossers, Alex; Heutink, Rene |
| EPI2014945 | Poland | 2022-Feb-08 | EPI_ISL_11922810 | A/duck/Poland/H126_22VIR2515-4/2022 | National Veterinary Research Institute | Istituto Zooprofilattico Sperimentale delle Venezie | Swieton, E.; Smietanka, K.; Barbierato, G.; Zecchin, B.; Fusaro, A.; Schivo, A.; Salviato, A.; Palumbo, E.; Giussani, E.; Monne, I.; Terregino, C. |
| EPI2014929 | Poland | 2022-Mar-02 | EPI_ISL_11922808 | A/duck/Poland/H188_22VIR2515-2/2022 | National Veterinary Research Institute | Istituto Zooprofilattico Sperimentale delle Venezie | Swieton, E.; Smietanka, K.; Barbierato, G.; Zecchin, B.; Fusaro, A.; Schivo, A.; Salviato, A.; Palumbo, E.; Giussani, E.; Monne, I.; Terregino, C. |
| EPI1998058 | Ireland | 2021-Dec-11 | EPI_ISL_11259273 | A/duck/Ireland/036105_22VIR1325-22/2021 | Central Veterinary Research Laboratory | Istituto Zooprofilattico Sperimentale delle Venezie | Byrne, C.; Garcia, K.; Cuartero, L.G.; Barbierato, G.; Zecchin, B.; Fusaro, A.; Schivo, A.; Salviato, A.; Palumbo, E.; Giussani, E.; Monne, I.; Terregino, C. |
| EPI1998017 | Ireland | 2021-Dec-17 | EPI_ISL_11259268 | A/duck/Ireland/036646_22VIR1325-18/2021 | Central Veterinary Research Laboratory | Istituto Zooprofilattico Sperimentale delle Venezie | Byrne, C.; Garcia, K.; Cuartero, L.G.; Barbierato, G.; Zecchin, B.; Fusaro, A.; Schivo, A.; Salviato, A.; Palumbo, E.; Giussani, E.; Monne, I.; Terregino, C. |
| EPI1995256 | Bulgaria | 2021-Dec-16 | EPI_ISL_11009382 | A/duck/Bulgaria/827-2_22VIR778-8/2021 | NDRVMI (National Diagnostic and Research Veterinary Medical Institute) | Istituto Zooprofilattico Sperimentale Delle Venezie | Goujgoulova, G.; Slavcheva, I.; Oreshkova, L.; Barbierato, G.; Zecchin, B.; Fusaro, A.; Schivo, A.; Salviato, A.; Palumbo, E.; Giussani, E.; Monne, I.; Terregino, C. |
| EPI1995164 | Bulgaria | 2021-Dec-01 | EPI_ISL_11007540 | A/duck/Bulgaria/756-4_22VIR778-6/2021 | NDRVMI (National Diagnostic and Research Veterinary Medical Institute) | Istituto Zooprofilattico Sperimentale delle Venezie | Goujgoulova, G.; Slavcheva, I.; Oreshkova, L.; Barbierato, G.; Zecchin, B.; Fusaro, A.; Schivo, A.; Salviato, A.; Palumbo, E.; Giussani, E.; Monne, I.; Terregino, C. |
| EPI1945163 | Germany | 2021-Oct-17 | EPI_ISL_7753230 | A/mallard/Germany-NI/AI06010/2021 | Lebensmittel- und Veterinärinstitut Oldenburg - Standort Veterinärinstitut | Friedrich-Loeffler-Institut | NA |
| EPI1963873 | United Kingdom | 2021-Nov-18 | EPI_ISL_9029959 | A/domestic_duck/England/058612/2021 | Animal and Plant Health Agency (APHA) | Animal and Plant Health Agency (APHA) | NA |
| EPI1937655 | Poland | 2021-Nov-07 | EPI_ISL_6934175 | A/domestic_duck/Poland/H1942-N/2021 | National Veterinary Research Institut Poland, PIWet-PIB | National Veterinary Research Institut Poland, PIWet-PIB | E. Swieton, K. Smietanka |
| EPI1954257 | Croatia | 2021-Nov-22 | EPI_ISL_8568483 | A/gadwall/Croatia/108/2021 | Croatian Veterinary Institute, Poultry Centre | Croatian Veterinary Institute | Savić, Vladimir |
| EPI1963889 | United Kingdom | 2021-Nov-01 | EPI_ISL_9029961 | A/Canada_goose/England/385250/2021 | Animal and Plant Health Agency (APHA) | Animal and Plant Health Agency (APHA) | NA |
| EPI1949874 | France | 2021-Dec-15 | EPI_ISL_8377056 | A/pelican/France/21P013720/2021 | Anses (Ploufragan-Plouzané) | ANSES Agence Nationale De Securite Sanitaire De L’alimentation | NA |
| EPI1945538 | Finland | 2021-Jun-01 | EPI_ISL_7778775 | A/barnacle_goose/Finland/6955_21VIR7689-9/2021 | Finnish Food Authority | Istituto Zooprofilattico Sperimentale Delle Venezie | Tammiranta, N.; Kantala, T.; Laamanen, I.; Gadd, T.; Zecchin, B.; Fusaro, A.; Schivo, A.; Salviato, A.; Palumbo, E.; Milani, A.; Giussani, E.; Pastori, A.; Monne, I.; Terregino, C. |
| EPI1945522 | Finland | 2021-May-01 | EPI_ISL_7778773 | A/barnacle_goose/Finland/6247_21VIR7689-6/2021 | Finnish Food Authority | Istituto Zooprofilattico Sperimentale Delle Venezie | Tammiranta, N.; Kantala, T.; Laamanen, I.; Gadd, T.; Zecchin, B.; Fusaro, A.; Schivo, A.; Salviato, A.; Palumbo, E.; Milani, A.; Giussani, E.; Pastori, A.; Monne, I.; Terregino, C. |
| EPI1945485 | Finland | 2021-Aug-01 | EPI_ISL_7778768 | A/Eurasian_eagle-owl/Finland/10617_21VIR7689-15/2021 | Finnish Food Authority | Istituto Zooprofilattico Sperimentale Delle Venezie | Tammiranta, N.; Kantala, T.; Laamanen, I.; Gadd, T.; Zecchin, B.; Fusaro, A.; Schivo, A.; Salviato, A.; Palumbo, E.; Milani, A.; Giussani, E.; Pastori, A.; Monne, I.; Terregino, C. |
| EPI1945469 | Finland | 2021-Aug-01 | EPI_ISL_7778766 | A/European_herring_gull/Finland/9722_21VIR7689-13/2021 | Finnish Food Authority | Istituto Zooprofilattico Sperimentale Delle Venezie | Tammiranta, N.; Kantala, T.; Laamanen, I.; Gadd, T.; Zecchin, B.; Fusaro, A.; Schivo, A.; Salviato, A.; Palumbo, E.; Milani, A.; Giussani, E.; Pastori, A.; Monne, I.; Terregino, C. |
| EPI1945461 | Finland | 2021-Jul-01 | EPI_ISL_7778765 | A/golden_eagle/Finland/9378_21VIR7689-12/2021 | Finnish Food Authority | Istituto Zooprofilattico Sperimentale Delle Venezie | Tammiranta, N.; Kantala, T.; Laamanen, I.; Gadd, T.; Zecchin, B.; Fusaro, A.; Schivo, A.; Salviato, A.; Palumbo, E.; Milani, A.; Giussani, E.; Pastori, A.; Monne, I.; Terregino, C. |
| EPI1945445 | Finland | 2021-Jun-01 | EPI_ISL_7778763 | A/white-tailed_eagle/Finland/6984_21VIR7689-10/2021 | Finnish Food Authority | Istituto Zooprofilattico Sperimentale Delle Venezie | Tammiranta, N.; Kantala, T.; Laamanen, I.; Gadd, T.; Zecchin, B.; Fusaro, A.; Schivo, A.; Salviato, A.; Palumbo, E.; Milani, A.; Giussani, E.; Pastori, A.; Monne, I.; Terregino, C. |
| EPI1945389 | Estonia | 2021-Jun-02 | EPI_ISL_7778756 | A/gull/Estonia/TA2113284-4_21VIR7512-8/2021 | Estonian Veterinary and Food Laboratory | Istituto Zooprofilattico Sperimentale Delle Venezie | Nurmoja, I.; Vilem, A.; Juurik, T.; Zecchin, B.; Fusaro, A.; Schivo, A.; Salviato, A.; Palumbo, E.; Milani, A.; Giussani, E.; Pastori, A.; Monne, I.; Terregino, C. |
| EPI1945381 | Estonia | 2021-May-16 | EPI_ISL_7778755 | A/white-tailed_eagle/Estonia/TA2111864-2_21VIR7512-6/2021 | Estonian Veterinary and Food Laboratory | Istituto Zooprofilattico Sperimentale Delle Venezie | Nurmoja, I.; Vilem, A.; Juurik, T.; Zecchin, B.; Fusaro, A.; Schivo, A.; Salviato, A.; Palumbo, E.; Milani, A.; Giussani, E.; Pastori, A.; Monne, I.; Terregino, C. |
| EPI1945373 | Estonia | 2021-Oct-12 | EPI_ISL_7778754 | A/Withe-tiled_eagle/Estonia/TA2124126-1_21VIR10433-11/2021 | Estonian Veterinary and Food Laboratory | Istituto Zooprofilattico Sperimentale Delle Venezie | Nurmoja, I.; Vilem, A.; Juurik, T.; Zecchin, B.; Fusaro, A.; Schivo, A.; Salviato, A.; Palumbo, E.; Milani, A.; Giussani, E.; Pastori, A.; Monne, I.; Terregino, C. |
| EPI1988977 | Belgium | 2022-Jan-23 | EPI_ISL_10576444 | A/Anser_anser/Belgium/1809_0002/2022 | Sciensano - Animal Infectious Diseases | Sciensano, Department of Animal Infectious Diseases | Van Borm, Steven; Roupie, Virginie; Lambrecht, Benedicte; Mathijs, Elisabeth; Steensels, Mieke |
| EPI1930158 | Belgium | 2021-Nov-04 | EPI_ISL_6761101 | A/Branta_leucopsis/Belgium/14735_0001/2021 | Sciensano - Animal Infectious Diseases | Sciensano, Department of Animal Infectious Diseases | Van Borm, Steven; Roupie, Virginie; Lambrecht, Benedicte; Mathijs, Elisabeth; Steensels, Mieke |
| EPI1966001 | Belgium | 2021-Dec-27 | EPI_ISL_9161618 | A/Gallus_gallus/Belgium/17100_0001/2021 | Sciensano - Animal Infectious Diseases | Sciensano, Department of Animal Infectious Diseases | Van Borm, Steven; Roupie, Virginie; Lambrecht, Benedicte; Mathijs, Elisabeth; Steensels, Mieke |
| EPI1963857 | United Kingdom | 2021-Nov-14 | EPI_ISL_9029956 | A/chicken/England/057314/2021 | Animal and Plant Health Agency (APHA) | Animal and Plant Health Agency (APHA) | NA |
| EPI1963040 | Russian Federation | 2021-Dec-13 | EPI_ISL_9009317 | A/chicken/Rostov-on-Don/159-7V/2021 | State Research Center of Virology and Biotechnology (VECTOR) | State Research Center of Virology and Biotechnology (VECTOR) | NA |
| EPI1963032 | Russian Federation | 2021-Dec-13 | EPI_ISL_9009309 | A/chicken/Rostov-on-Don/159-6V/2021 | State Research Center of Virology and Biotechnology (VECTOR) | State Research Center of Virology and Biotechnology (VECTOR) | NA |
| EPI1963024 | Russian Federation | 2021-Dec-13 | EPI_ISL_9009304 | A/chicken/Rostov-on-Don/159-5V/2021 | State Research Center of Virology and Biotechnology (VECTOR) | State Research Center of Virology and Biotechnology (VECTOR) | NA |
| EPI1963016 | Russian Federation | 2021-Dec-13 | EPI_ISL_9009303 | A/chicken/Rostov-on-Don/159-4V/2021 | State Research Center of Virology and Biotechnology (VECTOR) | State Research Center of Virology and Biotechnology (VECTOR) | NA |
| EPI1963008 | Russian Federation | 2021-Dec-13 | EPI_ISL_9009302 | A/chicken/Rostov-on-Don/159-3V/2021 | State Research Center of Virology and Biotechnology (VECTOR) | State Research Center of Virology and Biotechnology (VECTOR) | NA |
| EPI1963000 | Russian Federation | 2021-Dec-13 | EPI_ISL_9009297 | A/chicken/Rostov-on-Don/159-2V/2021 | State Research Center of Virology and Biotechnology (VECTOR) | State Research Center of Virology and Biotechnology (VECTOR) | NA |
| EPI1962992 | Russian Federation | 2021-Dec-13 | EPI_ISL_9009296 | A/chicken/Rostov-on-Don/159-1V/2021 | State Research Center of Virology and Biotechnology (VECTOR) | State Research Center of Virology and Biotechnology (VECTOR) | NA |
| EPI1962984 | Russian Federation | 2021-Dec-02 | EPI_ISL_9009294 | A/chicken/Stavropol/146-1V/2021 | State Research Center of Virology and Biotechnology (VECTOR) | State Research Center of Virology and Biotechnology (VECTOR) | NA |
| EPI1962976 | Russian Federation | 2021-Nov-27 | EPI_ISL_9009292 | A/chicken/Kursk/132-1V/2021 | State Research Center of Virology and Biotechnology (VECTOR) | State Research Center of Virology and Biotechnology (VECTOR) | NA |
| EPI1962968 | Russian Federation | 2021-Nov-27 | EPI_ISL_9009291 | A/chicken/Kursk/132-1V/2021 | Center of Hygiene and Epidemiology in Kursk Oblast | State Research Center of Virology and Biotechnology (VECTOR) | NA |
| EPI1951309 | Czech Republic | 2021-Nov-25 | EPI_ISL_8515480 | A/chicken/Czech_Republic/23404/2021 | State Veterinary Institute Prague | State Veterinary Institute Prague | Alexander,Nagy;Lenka,Cernikova;Martina,Stara |
| EPI1946086 | Belgium | 2021-Dec-06 | EPI_ISL_7880696 | A/Gallus_gallus/Belgium/15977/2021 | Sciensano - Animal Infectious Diseases | Sciensano, Department of Animal Infectious Diseases | Van Borm, Steven; Roupie, Virginie; Lambrecht, Benedicte; Mathijs, Elisabeth; Steensels, Mieke |
| EPI1946078 | Belgium | 2021-Dec-07 | EPI_ISL_7880689 | A/Gallus_gallus/Belgium/16070_003/2021 | Sciensano - Animal Infectious Diseases | Sciensano, Department of Animal Infectious Diseases | Van Borm, Steven; Roupie, Virginie; Lambrecht, Benedicte; Mathijs, Elisabeth; Steensels, Mieke |
| EPI1942186 | Sweden | 2021-Nov-30 | EPI_ISL_7452805 | A/Chicken/Sweden/SVA211130SZ0427/FB290424-IP-1/M-2021 | National Veterinary Institute, SVA | National Veterinary Institute | NA |
| EPI1937647 | Poland | 2021-Nov-05 | EPI_ISL_6931288 | A/chicken/Poland/H1940-N/2021 | National Veterinary Research Institut Poland, PIWet-PIB | National Veterinary Research Institut Poland, PIWet-PIB | E. Swieton, K. Smietanka |
| EPI1937639 | Poland | 2021-Nov-03 | EPI_ISL_6931008 | A/domestic_goose/Poland/H1931-T1/2021 | National Veterinary Research Institut Poland, PIWet-PIB | National Veterinary Research Institut Poland, PIWet-PIB | E. Swieton, K. Smietanka |
| EPI1951301 | Czech Republic | 2021-Nov-18 | EPI_ISL_8515479 | A/goose/Czech_Republic/22608-2/2021 | State Veterinary Institute Prague | State Veterinary Institute Prague | Alexander,Nagy;Lenka,Cernikova;Martina,Stara |
| EPI1951293 | Czech Republic | 2021-Nov-18 | EPI_ISL_8515478 | A/goose/Czech_Republic/22608-1/2021 | State Veterinary Institute Prague | State Veterinary Institute Prague | Alexander,Nagy;Lenka,Cernikova;Martina,Stara |
| EPI1942304 | Croatia | 2021-Nov-18 | EPI_ISL_7570634 | A/goose/Croatia/107/2021 | Croatian Veterinary Institute, Poultry Centre | Croatian Veterinary Institute | Savić, Vladimir |
| EPI1965994 | Belgium | 2021-Nov-21 | EPI_ISL_9160206 | A/Anser_albifrons/Belgium/15465_0010/2021 | Sciensano - Animal Infectious Diseases | Sciensano, Department of Animal Infectious Diseases | Van Borm, Steven; Roupie, Virginie; Lambrecht, Benedicte; Mathijs, Elisabeth; Steensels, Mieke |
| EPI1963865 | United Kingdom | 2021-Nov-16 | EPI_ISL_9029957 | A/turkey/England/057679/2021 | Animal and Plant Health Agency (APHA) | Animal and Plant Health Agency (APHA) | NA |
| EPI1959924 | United Kingdom | 2021-Nov-10 | EPI_ISL_8814195 | A/turkey/England/056764/2021 | Animal and Plant Health Agency (APHA) | Animal and Plant Health Agency (APHA) | NA |
| EPI1959914 | United Kingdom | 2021-Nov-06 | EPI_ISL_8814146 | A/turkey/England/055251/2021 | Animal and Plant Health Agency (APHA) | Animal and Plant Health Agency (APHA) | NA |
| EPI1949326 | Sweden | 2021-Dec-12 | EPI_ISL_8338002 | A/Turkey/Sweden/SVA211212SZ0001/FB301013-IP-2/M-2021 | National Veterinary Institute, SVA | National Veterinary Institute | 'Siamak, Zohari' |
| EPI1937663 | Poland | 2021-Nov-08 | EPI_ISL_6935584 | A/turkey/Poland/H1944-N/2021 | National Veterinary Research Institut Poland, PIWet-PIB | National Veterinary Research Institut Poland, PIWet-PIB | E. Swieton, K. Smietanka |
| EPI1937631 | Poland | 2021-Nov-03 | EPI_ISL_6930564 | A/turkey/Poland/H1924-T1/2021 | National Veterinary Research Institut Poland, PIWet-PIB | National Veterinary Research Institut Poland, PIWet-PIB | E. Swieton, K. Smietanka |
| EPI1937623 | Poland | 2021-Nov-02 | EPI_ISL_6930238 | A/turkey/Poland/H1913-T1/2021 | National Veterinary Research Institut Poland, PIWet-PIB | National Veterinary Research Institut Poland, PIWet-PIB | E. Swieton, K. Smietanka |
| EPI1937615 | Poland | 2021-Nov-01 | EPI_ISL_6929970 | A/turkey/Poland/H1911-N/2021 | National Veterinary Research Institut Poland, PIWet-PIB | National Veterinary Research Institut Poland, PIWet-PIB | E. Swieton, K. Smietanka |
| EPI1937607 | Poland | 2021-Nov-01 | EPI_ISL_6929958 | A/turkey/Poland/H1910-T3/2021 | National Veterinary Research Institut Poland, PIWet-PIB | National Veterinary Research Institut Poland, PIWet-PIB | E. Swieton, K. Smietanka |

*All submitters of data can be contacted directly through the GISAID website (https://www.gisaid.org); NA: not available.
